# Supplementary material for: Wnt-Dependent Activation of ERK Mediates Repression of Chondrocyte Fate during Calvarial Development
Source: J Dev Biol. 2021 Jun 27;9(3):23. doi: 10.3390/jdb9030023 (PMC8293402; doi:10.3390/jdb9030023)
Supplement: Supplementary file 1 [file jdb-09-00023-s001.zip]

Archive with 4 entries (4 files):
- Final Supplement_PDF/Final_Supplement2.pdf
- Final Supplement_PDF/Final_Supplement4-Wls DDPCR data.pdf
- Final Supplement_PDF/Final_Supplemental.1_Erk qPCR data.pdf
- Final Supplement_PDF/Final_Supplemental3.pdf
